# Supplementary material for: Climate change and carnivores: shifts in the distribution and effectiveness of protected areas in the Amazon
Source: PeerJ. 2023 Sep 19;11:e15887. doi: 10.7717/peerj.15887 (PMC10516102; doi:10.7717/peerj.15887)
Supplement: Supplemental Information 2 — Records of occurrences (coordinates) of the target species. [file peerj-11-15887-s002.xlsx]

## Sheet: SpCamila_todas
spp	long	lat
sp1	-56.91	-5.38
sp1	-74.35	-8.94
sp1	-71.22	-10.13
sp1	-77.75	-4.02
sp1	-73.29	-3.73
sp1	-71.74	-2.14
sp1	-71.22	-10.13
sp1	-71.22	-10.13
sp1	-73.29	-3.73
sp1	-73.37	-10.74
sp1	-68.7	-12.52
sp1	-71.13	-12.2
sp1	-71.13	-12.2
sp1	-74.45	-4.62
sp1	-68.88	-12.96
sp1	-73.29	-3.73
sp1	-69.68	-13.52
sp1	-66.85	-10.67
sp1	-73.29	-3.73
sp1	-70.66	-9.79
sp1	-66.73	-10.77
sp1	-73.29	-3.73
sp1	-69.3	-12.84
sp1	-71.22	-10.13
sp1	-73.29	-3.73
sp1	-71.22	-10.13
sp1	-71.22	-10.13
sp1	-72.39	-0.6
sp1	-72.39	-0.6
sp1	-70.24	1.28
sp1	-69.5	-1.09
sp1	-69.97	0.95
sp1	-72.67	-7.65
sp1	-73.66	-7.43
sp1	-55.48	-4.61
sp1	-55.23	-4.53
sp1	-62.5	-5.5
sp1	-62.5	-5.5
sp1	-56.42	-3.36
sp1	-71.22	-10.13
sp1	-74.35	-8.94
sp1	-71.22	-10.13
sp1	-77.75	-4.02
sp1	-71.22	-10.13
sp1	-71.22	-10.13
sp1	-71.13	-12.2
sp1	-71.13	-12.2
sp1	-71.22	-10.13
sp1	-71.22	-10.13
sp1	-74.45	-4.62
sp1	-59.45	-10.18
sp1	-55.52	-1.9
sp1	-56.08	-9.87
sp1	-72.76	-8.84
sp1	-60.01	-3.13
sp1	-51.47	-1.74
sp1	-65.35	-4.89
sp1	-51.45	-1.72
sp1	-65.3	-4.87
sp1	-58.27	-9.84
sp1	-58.27	-9.84
sp1	-58.28	-9.84
sp1	-58.29	-9.82
sp1	-58.27	-9.82
sp1	-58.25	-9.82
sp1	-58.25	-9.84
sp1	-58.3	-9.85
sp1	-58.28	-9.87
sp1	-58.27	-9.88
sp1	-58.22	-9.86
sp1	-58.23	-9.84
sp1	-58.29	-9.82
sp1	-58.27	-9.82
sp1	-58.25	-9.82
sp1	-58.25	-9.84
sp1	-58.28	-9.84
sp1	-58.3	-9.85
sp1	-58.28	-9.87
sp1	-58.27	-9.88
sp1	-58.22	-9.86
sp1	-58.23	-9.84
sp1	-58.27	-9.85
sp1	-58.24	-9.87
sp1	-58.25	-9.87
sp1	-58.27	-9.86
sp1	-58.26	-9.85
sp1	-58.28	-9.83
sp1	-58.26	-9.83
sp1	-58.26	-9.84
sp1	-58.25	-9.85
sp1	-58.24	-9.85
sp1	-58.24	-9.85
sp1	-58.23	-9.85
sp1	-58.23	-9.86
sp1	-58.3	-9.85
sp1	-58.23	-9.85
sp1	-58.29	-9.82
sp1	-58.27	-9.82
sp1	-58.25	-9.82
sp1	-58.25	-9.84
sp1	-58.28	-9.84
sp1	-58.28	-9.87
sp1	-58.27	-9.88
sp1	-58.22	-9.86
sp1	-58.23	-9.84
sp1	-58.24	-9.87
sp1	-58.25	-9.87
sp1	-58.26	-9.86
sp1	-58.27	-9.86
sp1	-58.27	-9.85
sp1	-58.27	-9.85
sp1	-58.26	-9.85
sp1	-58.27	-9.84
sp1	-58.28	-9.83
sp1	-58.26	-9.83
sp1	-58.26	-9.84
sp1	-58.25	-9.85
sp1	-58.24	-9.85
sp1	-58.24	-9.85
sp1	-58.23	-9.86
sp1	-58.29	-9.82
sp1	-58.25	-9.84
sp1	-58.27	-9.82
sp1	-58.26	-9.85
sp1	-58.28	-9.84
sp1	-58.3	-9.85
sp1	-58.28	-9.87
sp1	-58.27	-9.88
sp1	-58.25	-9.87
sp1	-58.22	-9.86
sp1	-58.23	-9.84
sp1	-56.56	-9.42
sp1	-56.56	-9.43
sp1	-63.11	-9.08
sp1	-69.41	-12.87
sp1	-56.47	-9.88
sp1	-63.11	-9.08
sp1	-63.1	-9.19
sp1	-69.41	-12.87
sp1	-56.47	-9.88
sp1	-46.73	-1.87
sp1	-56.68	-4.33
sp1	-61.13	-8.46
sp1	-64.31	-8.62
sp1	-56.45	-4.85
sp1	-67.2	-5.41
sp1	-64.8	-9.43
sp1	-62.2	-5.55
sp1	-62.22	-10.78
sp1	-56.47	-9.88
sp1	-46.73	-1.87
sp1	-56.68	-4.33
sp1	-60.97	-8.29
sp1	-64.31	-8.62
sp1	-56.45	-4.85
sp1	-67.2	-5.41
sp1	-62.2	-5.55
sp1	-64.8	-9.43
sp1	-62.22	-10.78
sp1	-56.47	-9.88
sp1	-69.72	-9.46
sp1	-69.97	-9.41
sp1	-69.99	-9.46
sp1	-72.96	-3.14
sp1	-73	-3.07
sp1	-72.94	-3.05
sp1	-72.98	-3.07
sp1	-72.9	-3.17
sp1	-72.98	-3.05
sp1	-72.93	-3.05
sp1	-72.95	-3.14
sp1	-72.93	-3.16
sp1	-72.93	-3.08
sp1	-72.95	-3.14
sp1	-72.93	-3.12
sp1	-72.98	-3.12
sp1	-73	-3.05
sp1	-72.94	-3.12
sp1	-72.94	-3.1
sp1	-72.96	-3.07
sp1	-72.91	-3.14
sp1	-72.93	-3.19
sp1	-72.96	-3.1
sp1	-72.91	-3.19
sp1	-72.9	-3.21
sp1	-73	-3.12
sp1	-72.96	-3.19
sp1	-73	-3.14
sp1	-72.98	-3.1
sp1	-72.95	-3.23
sp1	-72.96	-3.16
sp1	-72.98	-3.16
sp1	-72.96	-3.05
sp1	-72.96	-3.23
sp1	-72.94	-3.21
sp1	-72.91	-3.21
sp1	-73	-3.08
sp1	-72.98	-3.08
sp1	-72.93	-3.1
sp1	-72.93	-3.23
sp1	-72.92	-3.17
sp1	-72.95	-3.17
sp1	-72.94	-3.07
sp1	-72.92	-3.16
sp1	-70.17	-12.41
sp1	-69.72	-11.48
sp1	-69.86	-11.48
sp1	-69.04	-12.23
sp1	-69.33	-11.62
sp1	-69.45	-12.99
sp1	-70.06	-12.54
sp1	-70.06	-12.54
sp1	-70.06	-12.54
sp1	-70.22	-12.41
sp1	-70.18	-12.35
sp1	-70.08	-12.42
sp1	-70.16	-12.36
sp1	-70.27	-12.44
sp1	-70.22	-12.38
sp1	-70.2	-12.36
sp1	-70.18	-12.42
sp1	-70.16	-12.4
sp1	-70.12	-12.37
sp1	-70.14	-12.42
sp1	-70.12	-12.4
sp1	-70.11	-12.43
sp1	-70.06	-12.4
sp1	-70.24	-12.43
sp1	-70.2	-12.4
sp1	-70.18	-12.38
sp1	-70.29	-12.42
sp1	-70.27	-12.41
sp1	-70.25	-12.39
sp1	-70.23	-12.45
sp1	-70.21	-12.43
sp1	-70.14	-12.39
sp1	-70.21	-12.47
sp1	-70.18	-12.45
sp1	-70.17	-12.44
sp1	-70.09	-12.39
sp1	-70.17	-12.48
sp1	-70.15	-12.46
sp1	-70.13	-12.45
sp1	-69.59	-11.43
sp1	-69.64	-11.47
sp1	-69.67	-11.46
sp1	-69.62	-11.43
sp1	-69.58	-11.44
sp1	-69.61	-11.52
sp1	-69.81	-11.46
sp1	-69.86	-11.55
sp1	-69.88	-11.53
sp1	-69.9	-11.52
sp1	-69.92	-11.52
sp1	-69.86	-11.56
sp1	-69.86	-11.57
sp1	-69.85	-11.54
sp1	-69.85	-11.52
sp1	-69.85	-11.5
sp1	-69.86	-11.49
sp1	-69.86	-11.46
sp1	-69.86	-11.45
sp1	-69.88	-11.42
sp1	-69.89	-11.4
sp1	-69.88	-11.47
sp1	-69.83	-11.56
sp1	-69.81	-11.55
sp1	-69.79	-11.53
sp1	-69.78	-11.52
sp1	-69.76	-11.51
sp1	-69.76	-11.49
sp1	-69.75	-11.48
sp1	-69.73	-11.47
sp1	-69.82	-11.47
sp1	-69.83	-11.49
sp1	-69.81	-11.49
sp1	-69.79	-11.49
sp1	-69.89	-11.47
sp1	-69.75	-11.51
sp1	-69.82	-11.52
sp1	-69.72	-11.46
sp1	-69.73	-11.43
sp1	-69.72	-11.41
sp1	-69.91	-11.46
sp1	-69.93	-11.45
sp1	-69.96	-11.44
sp1	-69.91	-11.5
sp1	-69.77	-11.48
sp1	-69.89	-11.41
sp1	-69.91	-11.38
sp1	-69.86	-11.43
sp1	-69.86	-11.46
sp1	-69.83	-11.48
sp1	-69.86	-11.48
sp1	-69.89	-11.47
sp1	-69.92	-11.46
sp1	-69.95	-11.44
sp1	-69.96	-11.43
sp1	-69.9	-11.52
sp1	-69.85	-11.51
sp1	-69.84	-11.54
sp1	-69.87	-11.54
sp1	-69.89	-11.53
sp1	-69.86	-11.57
sp1	-69.83	-11.56
sp1	-69.81	-11.54
sp1	-69.78	-11.52
sp1	-69.78	-11.49
sp1	-69.81	-11.49
sp1	-69.81	-11.44
sp1	-69.76	-11.49
sp1	-69.72	-11.46
sp1	-69.72	-11.44
sp1	-69.69	-11.49
sp1	-69.67	-11.49
sp1	-69.7	-11.46
sp1	-69.7	-11.43
sp1	-69.65	-11.4
sp1	-69.65	-11.41
sp1	-69.67	-11.44
sp1	-69.62	-11.41
sp1	-69.62	-11.46
sp1	-69.58	-11.46
sp1	-69.58	-11.49
sp1	-69.61	-11.48
sp1	-69.62	-11.54
sp1	-69.59	-11.58
sp1	-69.59	-11.52
sp1	-69.67	-11.52
sp1	-69.64	-11.53
sp1	-69.53	-11.57
sp1	-69.53	-11.51
sp1	-69.75	-11.46
sp1	-69.78	-11.46
sp1	-69.78	-11.43
sp1	-69.75	-11.43
sp1	-69.72	-11.48
sp1	-69.75	-11.51
sp1	-69.73	-11.51
sp1	-69.7	-11.52
sp1	-69.69	-11.41
sp1	-69.5	-11.5
sp1	-69.53	-11.56
sp1	-69.88	-11.52
sp1	-69.55	-11.5
sp1	-69.81	-11.51
sp1	-69.64	-11.51
sp1	-69.64	-11.48
sp1	-69.59	-11.54
sp1	-69.66	-11.54
sp1	-69.78	-11.54
sp1	-69.51	-11.59
sp1	-69.89	-11.43
sp1	-69.86	-11.41
sp1	-69.53	-11.54
sp1	-69.67	-11.41
sp1	-69.91	-11.49
sp1	-69.89	-11.48
sp1	-69.56	-11.54
sp1	-69.56	-11.58
sp1	-69.62	-11.57
sp1	-69.82	-11.46
sp1	-69.83	-11.43
sp1	-69.84	-11.58
sp1	-69.73	-11.47
sp1	-69.64	-11.59
sp1	-69.7	-11.54
sp1	-69.73	-11.54
sp1	-69.75	-11.54
sp1	-68.99	-12.25
sp1	-68.98	-12.25
sp1	-69.05	-12.22
sp1	-69.11	-12.24
sp1	-69.09	-12.22
sp1	-69	-12.26
sp1	-68.99	-12.26
sp1	-69	-12.27
sp1	-68.99	-12.27
sp1	-68.98	-12.27
sp1	-68.98	-12.26
sp1	-69.05	-12.23
sp1	-69.04	-12.23
sp1	-69.03	-12.23
sp1	-69.03	-12.22
sp1	-69.03	-12.21
sp1	-69.04	-12.22
sp1	-69.09	-12.24
sp1	-69.1	-12.24
sp1	-69.11	-12.22
sp1	-69.1	-12.22
sp1	-69.09	-12.23
sp1	-69.1	-12.23
sp1	-69.34	-11.62
sp1	-69.34	-11.64
sp1	-69.4	-11.64
sp1	-69.39	-11.66
sp1	-69.32	-11.63
sp1	-69.32	-11.62
sp1	-69.33	-11.62
sp1	-69.33	-11.64
sp1	-69.32	-11.64
sp1	-69.33	-11.63
sp1	-69.28	-11.6
sp1	-69.28	-11.61
sp1	-69.28	-11.62
sp1	-69.29	-11.6
sp1	-69.3	-11.61
sp1	-69.3	-11.62
sp1	-69.29	-11.62
sp1	-69.29	-11.61
sp1	-69.3	-11.6
sp1	-69.39	-11.64
sp1	-69.41	-11.65
sp1	-69.4	-11.65
sp1	-69.39	-11.65
sp1	-69.4	-11.66
sp1	-69.41	-11.66
sp1	-69.46	-12.95
sp1	-69.42	-13.02
sp1	-69.47	-12.98
sp1	-69.47	-12.97
sp1	-69.48	-13.02
sp1	-69.47	-12.99
sp1	-69.46	-12.99
sp1	-69.44	-12.99
sp1	-69.48	-12.98
sp1	-69.46	-12.98
sp1	-69.43	-12.98
sp1	-69.48	-12.97
sp1	-69.46	-12.97
sp1	-69.45	-12.97
sp1	-69.44	-12.97
sp1	-69.42	-12.97
sp1	-69.46	-13.02
sp1	-69.44	-13.02
sp1	-69.48	-13
sp1	-69.47	-13
sp1	-69.46	-13
sp1	-69.45	-13
sp1	-69.44	-13
sp1	-69.43	-13
sp1	-69.42	-13
sp1	-69.48	-12.99
sp1	-69.46	-12.99
sp1	-69.45	-12.99
sp1	-69.44	-12.99
sp1	-69.43	-12.99
sp1	-69.48	-12.98
sp1	-69.45	-12.99
sp1	-69.43	-12.99
sp1	-69.42	-12.99
sp1	-69.47	-12.98
sp1	-69.45	-12.98
sp1	-69.44	-12.98
sp1	-69.5	-12.97
sp1	-69.43	-12.97
sp1	-69.49	-12.95
sp1	-69.48	-12.95
sp1	-69.44	-12.95
sp1	-69.42	-12.95
sp1	-70.06	-12.52
sp1	-70.05	-12.56
sp1	-70.05	-12.53
sp1	-70.04	-12.51
sp1	-70.07	-12.52
sp1	-70.08	-12.52
sp1	-70.04	-12.55
sp1	-70.08	-12.54
sp1	-70.08	-12.53
sp1	-70.07	-12.54
sp1	-70.06	-12.54
sp1	-70.06	-12.55
sp1	-70.05	-12.58
sp1	-70.05	-12.55
sp1	-70.05	-12.54
sp1	-70.05	-12.53
sp1	-70.11	-12.55
sp1	-70.12	-12.53
sp1	-70.13	-12.55
sp1	-70.09	-12.51
sp1	-70.07	-12.51
sp1	-70.05	-12.51
sp1	-70.05	-12.52
sp1	-70.06	-12.53
sp1	-70.07	-12.53
sp1	-70.09	-12.53
sp1	-70.06	-12.53
sp1	-70.07	-12.55
sp1	-70.07	-12.54
sp1	-70.04	-12.58
sp1	-70.04	-12.56
sp1	-70.03	-12.53
sp1	-70.09	-12.56
sp1	-70.09	-12.58
sp1	-70.1	-12.56
sp1	-70.09	-12.54
sp1	-70.08	-12.53
sp1	-70.07	-12.56
sp1	-70.07	-12.57
sp1	-70.07	-12.56
sp1	-70.05	-12.56
sp1	-70.05	-12.53
sp1	-70.07	-12.51
sp1	-70.07	-12.52
sp1	-70.06	-12.53
sp1	-70.07	-12.53
sp1	-70.04	-12.56
sp1	-70.04	-12.55
sp1	-70.07	-12.57
sp1	-70.08	-12.54
sp1	-70.08	-12.53
sp1	-70.07	-12.54
sp1	-70.06	-12.54
sp1	-70.06	-12.55
sp1	-70.05	-12.58
sp1	-70.05	-12.55
sp1	-70.05	-12.54
sp1	-70.05	-12.53
sp1	-70.11	-12.55
sp1	-70.12	-12.53
sp1	-70.13	-12.55
sp1	-70.09	-12.51
sp1	-70.05	-12.51
sp1	-70.04	-12.51
sp1	-70.05	-12.52
sp1	-70.06	-12.52
sp1	-70.08	-12.52
sp1	-70.09	-12.53
sp1	-70.06	-12.53
sp1	-70.07	-12.55
sp1	-70.07	-12.54
sp1	-70.04	-12.58
sp1	-70.03	-12.53
sp1	-70.09	-12.56
sp1	-70.09	-12.58
sp1	-70.1	-12.56
sp1	-70.09	-12.55
sp1	-70.08	-12.53
sp1	-70.07	-12.56
sp1	-70.07	-12.56
sp1	-70.05	-12.56
sp1	-70.04	-12.51
sp1	-70.1	-12.56
sp1	-70.13	-12.55
sp1	-70.12	-12.53
sp1	-70.11	-12.55
sp1	-70.09	-12.56
sp1	-70.09	-12.58
sp1	-70.09	-12.51
sp1	-70.07	-12.51
sp1	-70.05	-12.51
sp1	-70.03	-12.53
sp1	-70.05	-12.53
sp1	-70.07	-12.53
sp1	-70.09	-12.53
sp1	-70.05	-12.54
sp1	-70.04	-12.55
sp1	-70.04	-12.56
sp1	-70.04	-12.58
sp1	-70.05	-12.58
sp1	-70.07	-12.56
sp1	-70.07	-12.57
sp1	-70.07	-12.54
sp1	-70.09	-12.55
sp1	-70.24	-6.84
sp1	-55.49	-3.83
sp1	-55.49	-3.83
sp1	-55.49	-3.83
sp1	-55.49	-3.83
sp1	-55.8	-9.81
sp1	-55.8	-9.81
sp1	-77.12	-1.01
sp1	-76	-0.71
sp1	-76.01	-1.71
sp1	-76.45	-0.67
sp1	-77.16	-1.01
sp1	-77.08	-0.97
sp1	-77.08	-1.03
sp1	-77.18	-1.06
sp1	-77.08	-0.99
sp1	-77.08	-1.04
sp1	-77.11	-1.05
sp1	-77.15	-1.03
sp1	-77.13	-1
sp1	-77.13	-1.06
sp1	-77.09	-1.01
sp1	-77.16	-0.97
sp1	-77.08	-1.01
sp1	-77.11	-0.99
sp1	-77.12	-0.98
sp1	-77.12	-1.01
sp1	-77.11	-1.03
sp1	-77.14	-0.98
sp1	-77.14	-1.02
sp1	-77.14	-1.04
sp1	-77.16	-0.99
sp1	-77.06	-1.01
sp1	-77.17	-1.04
sp1	-76.06	-0.7
sp1	-76.04	-0.65
sp1	-76.01	-0.73
sp1	-76.03	-0.7
sp1	-75.97	-0.67
sp1	-75.95	-0.76
sp1	-76.01	-0.69
sp1	-76.02	-0.72
sp1	-75.99	-0.72
sp1	-75.99	-0.74
sp1	-75.99	-0.76
sp1	-76.03	-0.73
sp1	-76.04	-0.71
sp1	-75.97	-0.71
sp1	-75.97	-0.74
sp1	-75.97	-0.76
sp1	-75.99	-0.7
sp1	-75.99	-0.69
sp1	-76	-0.67
sp1	-76.02	-0.68
sp1	-76.04	-0.67
sp1	-76.07	-0.67
sp1	-75.97	-0.69
sp1	-75.94	-0.72
sp1	-75.94	-0.74
sp1	-76.04	-1.71
sp1	-75.98	-1.75
sp1	-75.99	-1.64
sp1	-76.01	-1.68
sp1	-75.99	-1.72
sp1	-76	-1.73
sp1	-76.04	-1.77
sp1	-75.98	-1.63
sp1	-76.02	-1.65
sp1	-76	-1.66
sp1	-75.98	-1.65
sp1	-76.04	-1.67
sp1	-76.03	-1.67
sp1	-75.99	-1.67
sp1	-75.97	-1.68
sp1	-75.99	-1.69
sp1	-75.97	-1.7
sp1	-76.01	-1.7
sp1	-76.03	-1.72
sp1	-76.02	-1.72
sp1	-76.02	-1.74
sp1	-76.04	-1.75
sp1	-76	-1.75
sp1	-76.02	-1.76
sp1	-76.02	-1.78
sp1	-76.02	-1.8
sp1	-76.41	-0.71
sp1	-76.39	-0.71
sp1	-76.42	-0.7
sp1	-76.42	-0.67
sp1	-76.42	-0.68
sp1	-76.45	-0.68
sp1	-76.46	-0.7
sp1	-76.4	-0.67
sp1	-76.48	-0.62
sp1	-76.5	-0.62
sp1	-76.44	-0.7
sp1	-76.44	-0.72
sp1	-76.46	-0.63
sp1	-76.44	-0.62
sp1	-76.48	-0.64
sp1	-76.5	-0.65
sp1	-76.48	-0.69
sp1	-76.46	-0.61
sp1	-76.44	-0.65
sp1	-76.42	-0.64
sp1	-76.46	-0.66
sp1	-76.49	-0.66
sp1	-76.38	-0.69
sp1	-76.37	-0.71
sp1	-76.4	-0.7
sp1	-76.47	-0.67
sp1	-68.85	-13
sp1	-67.85	-14.64
sp1	-73.21	-4.4
sp1	-66.96	-14.18
sp1	-68.75	-13.59
sp1	-71.46	-11.89
sp1	-67.68	-15.49
sp1	-67.69	-14.64
sp1	-67.69	-14.64
sp1	-67.86	-14.47
sp1	-67.69	-14.56
sp1	-68.76	-13.59
sp1	-68.86	-13.46
sp1	-61.67	-5.05
sp1	-75.68	-0.32
sp1	-75.49	-1.1
sp1	-67.65	-14.61
sp1	-69.53	-13.08
sp1	-67.71	-14.64
sp1	-68.86	-12.91
sp1	-68.75	-13.58
sp1	-67.71	-14.55
sp1	-67.73	-14.57
sp1	-67.74	-14.54
sp1	-68.89	-13.08
sp1	-68.89	-12.9
sp1	-67.86	-14.63
sp1	-73.18	-4.3
sp1	-73.18	-4.4
sp1	-73.18	-4.31
sp1	-73.18	-4.35
sp1	-66.9	-14.17
sp1	-66.99	-14.23
sp1	-66.94	-14.19
sp1	-68.74	-13.6
sp1	-68.73	-13.68
sp1	-68.8	-13.56
sp1	-68.72	-13.59
sp1	-68.73	-13.53
sp1	-68.72	-13.63
sp1	-68.78	-13.62
sp1	-68.75	-13.57
sp1	-68.8	-13.54
sp1	-68.8	-13.61
sp1	-68.82	-13.57
sp1	-68.82	-13.53
sp1	-68.73	-13.57
sp1	-68.69	-13.66
sp1	-67.64	-14.56
sp1	-67.81	-14.55
sp1	-67.66	-14.6
sp1	-71.54	-11.86
sp1	-71.64	-11.86
sp1	-71.61	-11.88
sp1	-67.78	-14.58
sp1	-67.76	-14.58
sp1	-71.52	-11.85
sp1	-71.49	-11.85
sp1	-71.37	-11.88
sp1	-71.6	-11.7
sp1	-71.66	-11.89
sp1	-71.59	-11.88
sp1	-67.76	-14.6
sp1	-67.58	-14.63
sp1	-67.74	-14.59
sp1	-67.78	-14.62
sp1	-67.77	-14.67
sp1	-67.64	-14.62
sp1	-67.61	-14.65
sp1	-67.79	-14.63
sp1	-67.69	-14.67
sp1	-67.65	-14.66
sp1	-67.66	-14.65
sp1	-67.74	-14.59
sp1	-67.66	-14.61
sp1	-67.77	-14.59
sp1	-67.58	-14.63
sp1	-67.67	-14.68
sp1	-67.6	-14.63
sp1	-67.72	-14.6
sp1	-67.72	-14.66
sp1	-67.64	-14.62
sp1	-67.73	-14.62
sp1	-67.91	-14.44
sp1	-67.8	-14.47
sp1	-67.85	-14.53
sp1	-67.92	-14.42
sp1	-67.89	-14.5
sp1	-67.87	-14.52
sp1	-67.85	-14.5
sp1	-67.83	-14.51
sp1	-67.82	-14.48
sp1	-67.82	-14.53
sp1	-67.72	-14.52
sp1	-67.66	-14.54
sp1	-67.6	-14.57
sp1	-67.66	-14.6
sp1	-67.72	-14.58
sp1	-67.69	-14.58
sp1	-67.8	-14.56
sp1	-67.78	-14.58
sp1	-67.76	-14.51
sp1	-67.74	-14.51
sp1	-68.71	-13.61
sp1	-68.81	-13.56
sp1	-68.78	-13.62
sp1	-68.75	-13.59
sp1	-68.74	-13.6
sp1	-68.81	-13.59
sp1	-68.8	-13.61
sp1	-68.73	-13.57
sp1	-68.73	-13.62
sp1	-68.77	-13.64
sp1	-68.8	-13.58
sp1	-68.72	-13.67
sp1	-68.72	-13.63
sp1	-68.85	-13.53
sp1	-68.9	-13.51
sp1	-68.88	-13.44
sp1	-68.87	-13.48
sp1	-68.84	-13.5
sp1	-68.83	-13.52
sp1	-68.91	-13.5
sp1	-68.9	-13.46
sp1	-68.89	-13.49
sp1	-68.88	-13.46
sp1	-68.86	-13.48
sp1	-68.87	-13.45
sp1	-68.86	-13.52
sp1	-68.88	-13.42
sp1	-68.87	-13.41
sp1	-68.8	-13.46
sp1	-68.87	-13.39
sp1	-68.82	-13.49
sp1	-61.12	-4.55
sp1	-61.06	-4.45
sp1	-62.1	-5.41
sp1	-61.09	-4.43
sp1	-61.13	-4.53
sp1	-61.79	-5.18
sp1	-62.09	-5.42
sp1	-62.11	-5.45
sp1	-62.12	-5.42
sp1	-62.18	-5.57
sp1	-62.19	-5.53
sp1	-62.2	-5.54
sp1	-62.2	-5.55
sp1	-61.12	-4.51
sp1	-61.11	-4.51
sp1	-61.79	-5.18
sp1	-61.79	-5.18
sp1	-62.09	-5.41
sp1	-62.11	-5.41
sp1	-62.19	-5.53
sp1	-75.61	-0.33
sp1	-75.47	-1.11
sp1	-75.69	-0.29
sp1	-67.74	-14.59
sp1	-67.59	-14.68
sp1	-67.77	-14.54
sp1	-67.77	-14.59
sp1	-67.72	-14.54
sp1	-67.69	-14.67
sp1	-67.69	-14.58
sp1	-67.66	-14.65
sp1	-67.66	-14.6
sp1	-67.61	-14.67
sp1	-67.6	-14.63
sp1	-67.6	-14.57
sp1	-67.57	-14.57
sp1	-67.56	-14.69
sp1	-67.53	-14.62
sp1	-67.49	-14.62
sp1	-69.52	-13.14
sp1	-69.5	-13.11
sp1	-69.5	-13.13
sp1	-69.45	-13.13
sp1	-69.62	-13.13
sp1	-69.47	-13.06
sp1	-69.46	-13.05
sp1	-69.6	-13.08
sp1	-69.59	-13.13
sp1	-69.58	-13.14
sp1	-69.53	-13.12
sp1	-69.51	-13.07
sp1	-69.51	-13.1
sp1	-69.5	-13.15
sp1	-69.48	-13.11
sp1	-69.47	-13.15
sp1	-69.44	-13.14
sp1	-67.74	-14.63
sp1	-67.73	-14.63
sp1	-67.69	-14.65
sp1	-68.82	-12.86
sp1	-68.82	-12.83
sp1	-68.88	-12.9
sp1	-68.86	-12.84
sp1	-68.74	-13.62
sp1	-67.74	-14.55
sp1	-67.78	-14.55
sp1	-67.75	-14.53
sp1	-67.74	-14.58
sp1	-67.72	-14.58
sp1	-67.72	-14.54
sp1	-67.68	-14.63
sp1	-67.67	-14.61
sp1	-67.74	-14.58
sp1	-67.75	-14.51
sp1	-67.74	-14.56
sp1	-67.7	-14.55
sp1	-67.7	-14.59
sp1	-67.68	-14.56
sp1	-55.76	-10.97
sp1	-71.92	-8.98
sp1	-69.44	-9.05
sp1	-69.46	-9.03
sp1	-69.46	-9.03
sp1	-69.45	-9.05
sp1	-68.2	-9.33
sp1	-72.54	-8.22
sp1	-55.48	-4.61
sp1	-55.23	-4.53
sp1	-67.87	-5.88
sp1	-67.88	-5.8
sp1	-67.21	-5.39
sp1	-67.23	-5.08
sp1	-68.95	-9.26
sp1	-68.95	-9.26
sp1	-68.95	-9.26
sp1	-69.26	-9.19
sp1	-69.97	-9.41
sp1	-69.99	-9.46
sp1	-67.21	-5.4
sp1	-67.2	-5.41
sp1	-67.14	-5.38
sp1	-67.19	-5.04
sp1	-67.19	-5.04
sp1	-67.19	-5.04
sp1	-67.21	-5.07
sp1	-67.21	-5.01
sp1	-67.21	-5.01
sp1	-67.35	-5.22
sp1	-66.97	-4.84
sp1	-66.99	-4.92
sp1	-67.73	-5.97
sp1	-67.9	-5.68
sp1	-67.9	-5.68
sp1	-67.78	-5.58
sp1	-67.57	-5.65
sp1	-67.61	-5.48
sp1	-67.28	-5.55
sp1	-67.28	-5.55
sp1	-67.3	-5.12
sp1	-67.3	-5.12
sp1	-67.3	-5.12
sp1	-67.3	-5.12
sp1	-67.27	-5.05
sp1	-67.16	-5.03
sp1	-66.8	-5.1
sp1	-66.8	-5.1
sp1	-66.8	-5.1
sp1	-68.63	-9.44
sp1	-65.35	-4.89
sp1	-51.5	-1.71
sp1	-51.48	-1.73
sp1	-51.45	-1.72
sp1	-61.06	-4.45
sp1	-61.06	-4.45
sp1	-61.06	-4.45
sp1	-61.06	-4.45
sp1	-61.09	-4.43
sp1	-61.11	-4.51
sp1	-61.11	-4.51
sp1	-61.11	-4.51
sp1	-61.11	-4.51
sp1	-61.12	-4.55
sp1	-61.12	-4.55
sp1	-61.13	-4.53
sp1	-61.79	-5.18
sp1	-61.79	-5.18
sp1	-61.79	-5.18
sp1	-61.87	-5.22
sp1	-62.09	-5.41
sp1	-62.09	-5.41
sp1	-62.09	-5.42
sp1	-62.1	-5.41
sp1	-62.1	-5.41
sp1	-62.1	-5.46
sp1	-62.11	-5.41
sp1	-62.11	-5.4
sp1	-62.12	-5.42
sp1	-62.15	-5.54
sp1	-62.18	-5.57
sp1	-62.19	-5.53
sp1	-62.19	-5.53
sp1	-62.2	-5.54
sp1	-62.2	-5.55
sp1	-67.88	-6.44
sp1	-67.93	-6.34
sp1	-67.83	-6.36
sp1	-68.26	-6.69
sp1	-68.25	-6.7
sp1	-68.24	-6.59
sp1	-68.7	-6.76
sp1	-68.69	-6.77
sp1	-50.53	-5.8
sp1	-50.55	-5.79
sp1	-50.54	-5.78
sp1	-50.54	-5.79
sp1	-56.45	-4.85
sp1	-56.44	-4.72
sp1	-56.41	-4.63
sp1	-56.29	-4.51
sp1	-56.17	-4.26
sp1	-56.4	-4.63
sp1	-56.44	-4.69
sp1	-56.91	-5.24
sp1	-62.68	-4.57
sp1	-62.66	-4.54
sp1	-61.59	-10.19
sp1	-64.79	-3.27
sp1	-77.81	-2.69
sp1	-75.41	-0.15
sp1	-76	0.15
sp1	-76.25	0.37
sp1	-76.48	-0.5
sp1	-77.97	-1.07
sp1	-77.92	-3.03
sp1	-78.06	-2.91
sp1	-77.72	-2.05
sp1	-77.32	-2.6
sp1	-75.71	-1.07
sp1	-75.9	-0.25
sp1	-77.64	-0.7
sp1	-56.47	-9.47
sp1	-56.57	-9.44
sp1	-56.57	-9.43
sp1	-56.77	-9.57
sp1	-56.57	-9.43
sp1	-60.94	-8.03
sp1	-60.97	-8.29
sp1	-60.97	-8.29
sp1	-61.04	-8.22
sp1	-61.65	-8.45
sp1	-61.65	-8.45
sp1	-61.65	-8.45
sp1	-61.65	-8.45
sp1	-61.5	-8.48
sp1	-61.25	-8.63
sp1	-61.72	-8.38
sp1	-61.27	-8.65
sp1	-60.98	-8.32
sp1	-60.98	-8.32
sp1	-60.92	-8.41
sp1	-60.97	-8.59
sp1	-64.31	-8.62
sp1	-64.38	-8.79
sp1	-64.38	-8.79
sp1	-64.58	-8.69
sp1	-64.58	-8.69
sp1	-64.58	-8.69
sp1	-64.48	-8.86
sp1	-64.48	-8.86
sp1	-64.77	-8.95
sp1	-64.64	-8.97
sp1	-64.58	-8.94
sp1	-64.72	-8.95
sp1	-64.68	-8.95
sp1	-67.78	-14.56
sp1	-67.74	-14.58
sp1	-67.7	-14.59
sp1	-67.77	-14.53
sp1	-67.73	-14.55
sp1	-67.77	-14.53
sp1	-67.77	-14.53
sp1	-67.77	-14.53
sp1	-67.67	-14.61
sp1	-67.68	-14.63
sp1	-67.76	-14.61
sp1	-67.69	-14.61
sp1	-67.69	-14.61
sp1	-67.74	-14.58
sp1	-67.72	-14.58
sp1	-67.72	-14.54
sp1	-67.75	-14.53
sp1	-68.74	-13.62
sp1	-68.74	-13.62
sp1	-68.74	-13.62
sp1	-68.74	-13.62
sp1	-68.74	-13.62
sp1	-68.74	-13.62
sp1	-68.74	-13.62
sp1	-68.74	-13.62
sp1	-68.82	-12.83
sp1	-68.82	-12.83
sp1	-68.82	-12.86
sp1	-68.82	-12.86
sp1	-67.77	-14.59
sp1	-67.74	-14.59
sp1	-67.74	-14.59
sp1	-67.74	-14.59
sp1	-67.74	-14.59
sp1	-67.69	-14.67
sp1	-67.66	-14.65
sp1	-67.6	-14.63
sp1	-67.61	-14.67
sp1	-67.66	-14.6
sp1	-67.77	-14.54
sp1	-67.72	-14.54
sp1	-67.57	-14.57
sp1	-67.56	-14.69
sp1	-67.55	-14.61
sp1	-67.55	-14.61
sp1	-67.53	-14.62
sp1	-67.49	-14.62
sp1	-67.6	-14.57
sp1	-67.6	-14.57
sp1	-69.02	-11.4
sp1	-65.82	-17.18
sp1	-62.5	-16
sp1	-63.67	-17.45
sp1	-76.15	-0.63
sp1	-76.16	-0.63
sp1	-76.15	-0.63
sp1	-76.14	-0.63
sp1	-76.17	-0.62
sp1	-76.17	-0.63
sp1	-76.16	-0.63
sp1	-76.14	-0.64
sp1	-76.14	-0.65
sp1	-76.14	-0.65
sp1	-76.16	-0.63
sp1	-70.39	-3.28
sp1	-73.36	-3.23
sp1	-68.2	-12.42
sp1	-68.22	-12.39
sp1	-68.22	-12.39
sp1	-68.2	-12.42
sp1	-68.2	-12.42
sp1	-68.2	-12.42
sp1	-68.23	-12.38
sp1	-68.21	-12.41
sp1	-68.21	-12.41
sp1	-68.21	-12.41
sp1	-68.21	-12.41
sp1	-68.21	-12.41
sp1	-68.21	-12.41
sp1	-68.22	-12.4
sp1	-68.22	-12.4
sp1	-68.23	-12.39
sp1	-68.25	-12.41
sp1	-68.23	-12.39
sp1	-70.33	-3.68
sp1	-70.31	-3.7
sp1	-70.3	-3.71
sp1	-69.89	-3.96
sp1	-76.17	-7.47
sp1	-62.83	-4.75
sp1	-55.98	-4.28
sp1	-71.23	-10.1
sp1	-69.9	-13.47
sp1	-64.95	-3.1
sp1	-78.67	-5.9
sp1	-74.93	-7.52
sp1	-65.27	-4.85
sp1	-62.47	-4.33
sp1	-63.11	-9.08
sp1	-63.1	-9.19
sp1	-62.25	-10.85
sp1	-62.22	-10.78
sp1	-56.47	-9.88
sp1	-50.36	-6.18
sp1	-71.22	-10.13
sp1	-71.37	-11.9
sp1	-69.05	-12.55
sp1	-70.22	-1.27
sp1	-68.88	-12.95
sp1	-56.68	-4.33
sp1	-77.75	-4.02
sp1	-67.82	-14.65
sp1	-70.1	-12.55
sp1	-76.15	-0.64
sp1	-68.7	-12.52
sp1	-69.3	-12.84
sp1	-66.85	-10.67
sp1	-66.73	-10.77
sp1	-68.88	-12.96
sp1	-74.35	-8.94
sp1	-71.22	-10.13
sp1	-71.22	-10.13
sp1	-71.22	-10.13
sp1	-71.22	-10.13
sp1	-71.22	-10.13
sp1	-71.22	-10.13
sp1	-74.45	-4.62
sp1	-73.92	-2.75
sp1	-69.5	-1.09
sp1	-73.56	-4.27
sp1	-73.66	-7.43
sp1	-72.67	-7.65
sp1	-69.97	0.95
sp1	-69.68	-13.52
sp1	-71.13	-12.2
sp1	-71.13	-12.2
sp1	-63.23	-14.43
sp1	-46.73	-1.87
sp1	-64.8	-9.43
sp1	-65.47	-9.61
sp1	-65.06	-9.63
sp1	-64.72	-9.44
sp1	-65.05	-9.59
sp1	-65.47	-9.61
sp1	-55.78	-10.92
sp1	-55.78	-10.97
sp1	-55.73	-10.98
sp1	-63.32	-12.31
sp1	-55.6	-2.98
sp2	-58.85	4.73
sp2	-70.72	-12.34
sp2	-58.85	4.73
sp2	-77.63	-0.54
sp2	-76.73	-1.1
sp2	-79.9	-2.17
sp2	-75.46	-10.39
sp2	-77.48	-1.73
sp2	-73.42	4.17
sp2	-72.17	8.17
sp2	-67.65	5.4
sp2	-65.28	2.25
sp2	-78.08	-2.72
sp2	-78.13	-2.65
sp2	-78.18	-4.54
sp2	-78.15	-4.46
sp2	-78.16	-4.46
sp2	-64.78	-17.11
sp2	-78.08	-1.08
sp2	-73.98	9
sp2	-73.52	-3.77
sp2	-75.32	-11.05
sp2	-74.6	-8.3
sp2	-74.68	-8.83
sp2	-76.97	-2.07
sp2	-75.53	-10.07
sp2	-74.58	-3.33
sp2	-77	-2
sp2	-77.29	-1.04
sp2	-69.3	-12.84
sp2	-78.23	-3.48
sp2	-69.08	-13
sp2	-73.06	4.68
sp2	-72.98	10.61
sp2	-75.1	-11.03
sp2	-63.66	-17.47
sp2	-73.21	8.4
sp2	-58.85	4.73
sp2	-78.15	-4.46
sp2	-78.16	-4.46
sp2	-78.18	-4.54
sp2	-75.46	-10.39
sp2	-79.9	-2.17
sp2	-78.13	-2.65
sp2	-74.68	-8.83
sp2	-75.32	-11.05
sp2	-74.6	-8.3
sp2	-75.53	-10.07
sp2	-64.78	-17.11
sp2	-65.28	2.25
sp2	-72.17	8.17
sp2	-78.08	-1.08
sp2	-78.08	-2.72
sp2	-75.32	-11.05
sp2	-76.97	-2.07
sp2	-74.58	-3.33
sp2	-73.52	-3.77
sp2	-76.97	-2.07
sp2	-73.42	4.17
sp2	-73.98	9
sp2	-77.5	-2
sp2	-77	-2
sp2	-77	-2
sp2	-77	-2
sp2	-73.42	4.17
sp2	-65.28	2.25
sp2	-72.17	8.17
sp2	-78.15	-4.46
sp2	-78.16	-4.46
sp2	-78.18	-4.54
sp2	-72.96	-3.14
sp2	-72.96	-3.14
sp2	-72.94	-3.19
sp2	-72.98	-3.07
sp2	-72.93	-3.16
sp2	-72.96	-3.19
sp2	-72.98	-3.16
sp2	-72.98	-3.12
sp2	-72.98	-3.08
sp2	-72.93	-3.19
sp2	-72.96	-3.08
sp2	-72.94	-3.05
sp2	-72.93	-3.05
sp2	-72.94	-3.23
sp2	-72.96	-3.16
sp2	-73	-3.14
sp2	-72.98	-3.1
sp2	-72.93	-3.23
sp2	-72.91	-3.23
sp2	-72.93	-3.21
sp2	-72.91	-3.21
sp2	-72.93	-3.17
sp2	-72.91	-3.17
sp2	-72.94	-3.12
sp2	-72.94	-3.1
sp2	-72.93	-3.1
sp2	-72.94	-3.08
sp2	-72.93	-3.08
sp2	-72.96	-3.05
sp2	-72.96	-3.23
sp2	-72.94	-3.21
sp2	-72.96	-3.21
sp2	-72.94	-3.17
sp2	-72.94	-3.16
sp2	-72.98	-3.14
sp2	-72.96	-3.12
sp2	-73	-3.12
sp2	-73	-3.08
sp2	-72.96	-3.07
sp2	-64.12	-8.38
sp2	-67.62	-8.29
sp2	-67.82	-8.89
sp2	-71.23	-7.58
sp2	-71.25	-7.7
sp2	-71.13	-7.49
sp2	-71.3	-7.63
sp2	-71.3	-7.63
sp2	-71.13	-7.49
sp2	-71.25	-7.7
sp2	-60.32	-3.68
sp2	-61.47	-5.1
sp2	-61.1	-4.9
sp2	-72.4	-8.42
sp2	-73.67	-7.33
sp2	-69.32	-5.2
sp2	-67.27	-5.45
sp2	-60.12	-4.15
sp2	-61.47	-5.15
sp2	-62.47	-4.3
sp2	-71.1	-7.47
sp2	-60.62	-3.88
sp2	-72.66	-7.65
sp2	-70.1	-12.57
sp3	-75.4	9.34
sp3	-75.38	10.07
sp3	-75.3	9.29
sp3	-75.08	9.5
sp3	-75.08	9.49
sp3	-56.62	-18.99
sp3	-76.18	4.85
sp3	-53.84	-34.38
sp3	-75.55	5.44
sp3	-52.36	-26.41
sp3	-74.21	6.81
sp3	-73.72	6.8
sp3	-57.73	-16.02
sp3	-74.21	6.81
sp3	-75.61	6.27
sp3	-43.49	-20.1
sp3	-47.99	-22.87
sp3	-60.63	-32.12
sp3	-63.22	-17.74
sp3	-58.26	-31.87
sp3	-58.26	-31.87
sp3	-58.25	-31.87
sp3	-48	-25.21
sp3	-75.54	4.74
sp3	-57.38	-17.72
sp3	-75.18	4.43
sp3	-58.65	-34.24
sp3	-75.77	4.8
sp3	-75.92	5.8
sp3	-75.69	4.79
sp3	-61.14	-30.1
sp3	-73.7	6.84
sp3	-72.35	4.92
sp3	-58.28	-31.86
sp3	-53.86	-34.43
sp3	-44.62	-22.44
sp3	-61.4	6.06
sp3	-55.96	-20.1
sp3	-53.77	-32.11
sp3	-53.75	-32.13
sp3	-53.75	-32.19
sp3	-56.62	-16.38
sp3	-56.62	-16.38
sp3	-56.62	-16.38
sp3	-56.62	-16.38
sp3	-47.76	-22.43
sp3	-57.2	-28.55
sp3	-48.29	-21.25
sp3	-58.18	-20.08
sp3	-69.14	7.56
sp3	-56.62	-16.38
sp3	-61.02	-18.86
sp3	-58.14	-32.22
sp3	-56.62	-16.38
sp3	-57.26	-16.5
sp3	-56.15	-15.7
sp3	-58.03	-28.02
sp3	-57.2	-28.55
sp3	-47.68	-3.25
sp3	-43.49	-20.1
sp3	-47.33	-22.33
sp3	-47.94	-22.85
sp3	-73.48	9.6
sp3	-74.07	11.1
sp3	-56.25	-34.36
sp3	-58.26	-31.86
sp3	-68.32	10.95
sp3	-73.73	6.86
sp3	-56.85	-16.82
sp3	-58.25	-31.87
sp3	-58.26	-31.86
sp3	-60.6	-22.03
sp3	-61.02	-21.72
sp3	-59.14	-23.31
sp3	-60.25	-22.33
sp3	-58.69	-23.68
sp3	-59.14	-23.31
sp3	-60.6	-22.03
sp3	-59.14	-23.31
sp3	-60.6	-22.03
sp3	-59.14	-23.31
sp3	-59.14	-23.31
sp3	-60.25	-22.33
sp3	-59.14	-23.31
sp3	-59.14	-23.31
sp3	-49.03	-25.38
sp3	-47.07	-23.44
sp3	-58.26	-31.87
sp3	-58.26	-31.87
sp3	-75.84	5.62
sp3	-59.59	-26.81
sp3	-72.52	11.15
sp3	-72.65	11.13
sp3	-57.44	-28.66
sp3	-73.41	3.55
sp3	-50.21	-29.48
sp3	-49.08	-26.92
sp3	-56.73	-16.6
sp3	-56.74	-16.59
sp3	-73.72	6.84
sp3	-58.26	-31.88
sp3	-58.27	-31.89
sp3	-58.27	-31.88
sp3	-58.25	-31.87
sp3	-58.27	-31.88
sp3	-49.83	-27.42
sp3	-72.46	5.47
sp3	-72.43	5.51
sp3	-72.41	5.52
sp3	-58.27	-31.88
sp3	-52.28	-22.53
sp3	-75.58	4.73
sp3	-56.51	-16.41
sp3	-58.12	-31.37
sp3	-56.87	-16.76
sp3	-56.87	-16.76
sp3	-56.87	-16.76
sp3	-56.87	-16.76
sp3	-73.72	6.81
sp3	-56.73	-16.53
sp3	-56.86	-16.75
sp3	-56.71	-16.51
sp3	-73.48	5.54
sp3	-40.42	-20.61
sp3	-60.88	-14.6
sp3	-61.03	-14.77
sp3	-44.7	-23.25
sp3	-56.62	-16.38
sp3	-73.65	6.84
sp3	-58.16	-25.09
sp3	-40.56	-19.96
sp3	-40.19	-19
sp3	-55.05	-34.37
sp3	-73.72	6.86
sp3	-76.12	1.72
sp3	-74.07	11.1
sp3	-54.48	-25.62
sp3	-50.73	-5.86
sp3	-74.59	5.07
sp3	-75.39	5.03
sp3	-75.49	5.05
sp3	-75.49	5.05
sp3	-75.49	5.04
sp3	-74.99	5.41
sp3	-75.5	5.13
sp3	-74.8	5.37
sp3	-75.51	5.1
sp3	-52.08	-31.35
sp3	-53.54	-30.37
sp3	-55.07	-30.5
sp3	-52.73	-31.91
sp3	-52.96	-30.27
sp3	-54.47	-30.36
sp3	-74.28	5.95
sp3	-74.28	5.95
sp3	-74.28	5.95
sp3	-74.28	5.95
sp3	-54.54	-34.76
sp3	-58.11	-31.46
sp3	-58.11	-31.46
sp3	-58.11	-31.46
sp3	-58.26	-31.86
sp3	-56.62	-16.38
sp3	-56.73	-16.53
sp3	-56.75	-16.5
sp3	-72.09	4.64
sp3	-72.03	4.62
sp3	-70.75	5.15
sp3	-72.1	4.66
sp3	-70.73	5.18
sp3	-70.76	5.17
sp3	-70.75	5.16
sp3	-72.1	4.68
sp3	-71.68	4.36
sp3	-70.76	5.16
sp3	-71.74	4.33
sp3	-72.1	4.64
sp3	-70.72	5.16
sp3	-40.5	-20.67
sp3	-40.12	-19.01
sp3	-54.53	-34.77
sp3	-50.56	-30.14
sp3	-47.92	-15.74
sp3	-66.55	6.93
sp3	-43.49	-20.1
sp3	-58.26	-31.86
sp3	-43.49	-20.1
sp3	-69.76	6.43
sp3	-69.79	6.28
sp3	-56.75	-16.5
sp3	-55.96	-20.1
sp3	-49.88	-27.95
sp3	-73.73	4.73
sp3	-73.55	4.77
sp3	-73.8	4.78
sp3	-73.87	4.77
sp3	-47.94	-22.85
sp3	-59.09	-31.81
sp3	-57.23	-28.55
sp3	-39.43	-7.3
sp3	-58.26	-31.86
sp3	-75.53	6.34
sp3	-75.53	6.34
sp3	-75.53	6.34
sp3	-49.47	-25.92
sp3	-66.55	6.93
sp3	-73.48	5.54
sp3	-73.67	6.82
sp3	-73.66	6.83
sp3	-61.11	5.54
sp3	-75.58	6.14
sp3	-73.66	6.99
sp3	-51.28	-15.22
sp3	-46.73	-22.94
sp3	-46.73	-22.94
sp3	-75.55	6.33
sp3	-58.23	-31.86
sp3	-73.76	6.8
sp3	-73.75	6.8
sp3	-58.51	-33.01
sp3	-58.49	-33.02
sp3	-75.56	4.03
sp3	-75.53	4.02
sp3	-75.64	4.01
sp3	-75.63	4.07
sp3	-75.56	4.03
sp3	-76.32	4.13
sp3	-76.46	3.95
sp3	-65.27	-10.71
sp3	-58.03	-32.53
sp3	-58.27	-31.86
sp3	-73.89	11.3
sp3	-54.94	-26.92
sp3	-58.26	-31.86
sp3	-58.26	-31.86
sp3	-58.21	-31.87
sp3	-60.63	-32.12
sp3	-72.48	5.46
sp3	-72.48	5.46
sp3	-58.26	-31.86
sp3	-58.22	-31.87
sp3	-58.26	-31.86
sp3	-58.22	-31.87
sp3	-58.26	-31.86
sp3	-74.05	11.11
sp3	-59.4	-22.95
sp3	-72.91	6.06
sp3	-78.21	8.83
sp3	-46.33	-23.96
sp3	-46.33	-23.96
sp3	-49.87	-22.97
sp3	-47.21	-23.09
sp3	-47.21	-23.09
sp3	-48.28	-18.92
sp3	-46.99	-24.32
sp3	-47.89	-22.01
sp3	-47.56	-22.41
sp3	-46.9	-22.74
sp3	-47.45	-23.5
sp3	-47.64	-22.72
sp3	-48.17	-21.79
sp3	-47.64	-22.72
sp3	-47.95	-18.17
sp3	-47.64	-22.72
sp3	-48.1	-21.72
sp3	-46.88	-23.18
sp3	-42.7	-9.02
sp3	-46.94	-22.37
sp3	-58.21	-31.87
sp3	-73.53	6.71
sp3	-54.91	-17.59
sp3	-73.47	9.64
sp3	-73.49	9.71
sp3	-73.46	9.66
sp3	-73.5	9.7
sp3	-73.49	9.66
sp3	-73.44	9.7
sp3	-73.45	9.71
sp3	-73.45	9.69
sp3	-73.45	9.69
sp3	-73.45	9.69
sp3	-73.45	9.69
sp3	-73.49	9.66
sp3	-73.5	9.64
sp3	-43.41	-22.56
sp3	-56.73	-16.56
sp3	-57.16	-28.49
sp3	-56.01	-28.05
sp3	-58.21	-31.87
sp3	-48.81	-26.03
sp3	-76.58	3.77
sp3	-76.58	3.77
sp3	-76.58	3.77
sp3	-76.58	3.77
sp3	-76.11	4.59
sp3	-76.43	3.97
sp3	-76.44	3.97
sp3	-76.58	3.58
sp3	-76.68	3.74
sp3	-76.68	3.74
sp3	-76.67	3.74
sp3	-76.67	3.75
sp3	-76.67	3.75
sp3	-75.58	4.73
sp3	-73.67	3.87
sp3	-58.25	-31.87
sp3	-58.25	-31.87
sp3	-58.27	-31.89
sp3	-58.25	-31.87
sp3	-58.27	-31.88
sp3	-50.99	-14.31
sp3	-55.65	-24.45
sp3	-60.1	-20.45
sp3	0.47	-58.3
sp3	-60.32	-20.63
sp3	-55.65	-24.45
sp3	-59.87	-20.63
sp3	-71.17	8.5
sp3	-60.32	-20.63
sp3	-74.68	6.07
sp3	-76.5	4.01
sp3	-76.42	4.2
sp3	-76.38	4.09
sp3	-76.4	4.17
sp3	-76.48	4.02
sp3	-76.42	4.13
sp3	-76.41	4.2
sp3	-76.4	4.08
sp3	-76.44	4.12
sp3	-76.4	4.23
sp3	-76.42	4.2
sp3	-76.38	4.09
sp3	-74.86	5.89
sp3	-75.59	6.16
sp3	-75.88	1.6
sp3	-56.74	-16.62
sp3	-49.94	-27.95
sp3	-58.27	-31.86
sp3	-74.03	4.81
sp3	-75.5	4.46
sp3	-75.5	4.47
sp3	-75.5	4.46
sp3	-75.48	4.45
sp3	-75.5	4.47
sp3	-75.48	4.45
sp3	-75.5	4.46
sp3	-75.5	4.47
sp3	-56.62	-16.38
sp3	-72.31	5.57
sp3	-72.25	5.61
sp3	-72.31	5.57
sp3	-72.25	5.61
sp3	-55.92	-20.23
sp3	-54.88	-32.89
sp3	-54	-32.38
sp3	-56.62	-16.38
sp3	-73.42	4.82
sp3	-75.18	8.55
sp3	-75.19	8.55
sp3	-75.21	8.55
sp3	-75.21	8.56
sp3	-75.19	8.55
sp3	-75.19	8.55
sp3	-75.19	8.55
sp3	-75.21	8.56
sp3	-75.21	8.56
sp3	-75.19	8.55
sp3	-48.42	-24.28
sp3	-58.24	-31.87
sp3	-60.63	-32.12
sp3	-73.77	4.98
sp3	-73.57	6.65
sp3	-58.29	-31.86
sp3	-58.26	-31.87
sp3	-76.31	4.29
sp3	-76.53	3.49
sp3	-52.25	-15.86
sp3	-42.72	-21.37
sp3	-73.58	6.56
sp3	-56.69	-16.53
sp3	-56.54	-22.97
sp3	-75.76	4.8
sp3	-48.17	-21.74
sp3	-43.49	-20.1
sp3	-41.13	-18.88
sp3	-39.5	-8.51
sp3	-73.19	3.53
sp3	-73.18	3.44
sp3	-73.14	4.18
sp3	-73.04	4.2
sp3	-73.05	4.22
sp3	-73.04	4.33
sp3	-73.04	4.2
sp3	-73.03	4.21
sp3	-73.02	4.2
sp3	-73.05	4.18
sp3	-73.21	4.18
sp3	-73.22	4.16
sp3	-73.26	4.16
sp3	-74.16	10.46
sp3	-74.17	10.46
sp3	-74.39	10.18
sp3	-74.15	10.36
sp3	-74.14	10.35
sp3	-74.15	10.36
sp3	-74.15	10.35
sp3	-74.15	10.54
sp3	-74.15	10.54
sp3	-74.15	10.54
sp3	-74.14	10.52
sp3	-76.44	3.88
sp3	-58.61	-23.73
sp3	-57.82	-24.78
sp3	-74.21	6.82
sp3	-74.02	4.71
sp3	-74.02	4.71
sp3	-56.2	-19.51
sp3	-53.11	-18.09
sp3	-56.87	-16.76
sp3	-71.6	5.42
sp3	-42.49	-22.61
sp3	-73.76	10.22
sp3	-73.79	10.19
sp3	-73.61	11.03
sp3	-73.44	11.22
sp3	-73.61	11.03
sp3	-73.35	11.14
sp3	-70.51	6.63
sp3	-70.53	6.68
sp3	-70.18	6.72
sp3	-70.2	6.73
sp3	-72.22	3.46
sp3	-74.06	11.08
sp3	-75.31	5.74
sp3	-56.3	-19.93
sp3	-73.9	7.35
sp3	-74.39	4.69
sp3	-74.39	4.69
sp3	-42.88	-20.75
sp3	-56.31	-19.96
sp3	-75.02	10.75
sp3	-75.02	10.75
sp3	-75.02	10.75
sp3	-75.02	10.75
sp3	-75.03	10.75
sp3	-75.03	10.75
sp3	-74.81	11.03
sp3	-75.03	10.75
sp3	-74.81	11.03
sp3	-74.81	11.03
sp3	-74.81	11.03
sp3	-75.03	10.75
sp3	-74.81	11.03
sp3	-74.81	11.03
sp3	-75.11	10.85
sp3	-75.03	10.75
sp3	-74.81	11.03
sp3	-74.81	11.03
sp3	-75.44	5.07
sp3	-74.03	4.71
sp3	-56.72	-16.55
sp3	-75.69	9.71
sp3	-37.83	-5.67
sp3	-40.86	-10.16
sp3	-56.69	-16.53
sp3	-55.5	-24.13
sp3	-59.83	-20.55
sp3	-56.09	-19.59
sp3	-68.09	8.93
sp3	-55.97	-20.1
sp3	-55.97	-20.1
sp3	-58.04	-28.02
sp3	-74.02	4.84
sp3	-72.45	4.94
sp3	-74	4.8
sp3	-72.45	4.94
sp3	-72.45	4.94
sp3	-74.02	4.84
sp3	-74.02	4.84
sp3	-73.22	10.61
sp3	-74.79	5.18
sp3	-74.79	5.18
sp3	-74.79	5.18
sp3	-74.81	5.17
sp3	-74.82	5.16
sp3	-74.8	5.17
sp3	-73.4	5.74
sp3	-74.07	11.1
sp3	-76.55	3.84
sp3	-76.4	3.99
sp3	-76.2	3.9
sp3	-76.14	4.53
sp3	-76.14	4.55
sp3	-76.21	3.82
sp3	-76.12	4.55
sp3	-76.19	3.9
sp3	-76.37	3.96
sp3	-76.04	3.58
sp3	-76.65	3.41
sp3	-76.6	3.54
sp3	-76.23	4.79
sp3	-76.17	3.24
sp3	-76.43	3.85
sp3	-76.63	3.42
sp3	-76.17	3.39
sp3	-76.2	3.83
sp3	-76.62	3.4
sp3	-76.21	3.82
sp3	-76.63	3.44
sp3	-76.04	4.89
sp3	-76.51	3.92
sp3	-76.17	3.4
sp3	-76.15	4.69
sp3	-76.13	4.85
sp3	-76.07	3.55
sp3	-76.07	4.79
sp3	-76.16	4.51
sp3	-76.22	3.85
sp3	-76.2	4.81
sp3	-76.13	3.87
sp3	-76.11	4.74
sp3	-76.1	4.72
sp3	-76.03	4.78
sp3	-76.56	3.37
sp3	-76.57	3.38
sp3	-76.57	3.35
sp3	-76.61	3.35
sp3	-76.61	3.37
sp3	-40.42	-20.6
sp3	-55.96	-20.1
sp3	-55.96	-20.1
sp3	-75.65	4.98
sp3	-75.06	5.52
sp3	-56.62	-16.38
sp3	-75.11	9.93
sp3	-72.54	7.75
sp3	-56.5	-15.27
sp3	-58.99	-34.09
sp3	-75.68	2.31
sp3	-58.85	-34.16
sp3	-58.66	-27.54
sp3	-54.85	-26.82
sp3	-76.74	8.18
sp3	-75.58	4.73
sp3	-58.23	-31.87
sp3	-57.19	-28.54
sp3	-76.07	3.66
sp3	-76.1	3.63
sp3	-59.45	2.82
sp3	-61.08	-20.12
sp3	-73.13	5.87
sp3	-73.14	5.85
sp3	-71	6.82
sp3	-73.23	7.23
sp3	-73.21	7.25
sp3	-73.16	7.27
sp3	-55.97	-20.1
sp3	-56.77	-16.51
sp3	-68.09	8.93
sp3	-39.94	-19.12
sp3	-40.6	-19.94
sp3	-40.63	-19.54
sp3	-40.6	-19.94
sp3	-40.6	-19.94
sp3	-41.13	-20.34
sp3	-40.6	-19.94
sp3	-40.6	-19.94
sp3	-40.6	-19.94
sp3	-43.67	-15.34
sp3	-40.41	-20
sp3	-40.6	-19.94
sp3	-40.6	-19.94
sp3	-40.6	-19.94
sp3	-40.41	-19.93
sp3	-40.66	-19.74
sp3	-40.41	-19.93
sp3	-40.6	-19.94
sp3	-40.6	-19.94
sp3	-40.41	-19.93
sp3	-40.6	-19.94
sp3	-40.6	-19.94
sp3	-40.41	-19.93
sp3	-40.6	-19.94
sp3	-40.6	-19.94
sp3	-40.85	-19.23
sp3	-69.78	9.88
sp3	-67.6	5.55
sp3	-68.25	10.58
sp3	-62.93	9.32
sp3	-68.25	10.58
sp3	-67.65	5.4
sp3	-67.67	10.35
sp3	-71.95	7.32
sp3	-61.32	4.58
sp3	-63.48	6.82
sp3	-63.48	6.82
sp3	-67.22	6.55
sp3	-68.33	10.2
sp3	-71.95	7.32
sp3	-67.62	5.45
sp3	-67.45	6.2
sp3	-68.33	10.2
sp3	-63.53	10.2
sp3	-67.62	5.45
sp3	-70.67	9.53
sp3	-73.62	4.15
sp3	-67.53	6.37
sp3	-67.62	5.45
sp3	-65.3	9.95
sp3	-67.53	6.37
sp3	-68.4	10.62
sp3	-67.53	6.37
sp3	-71.95	7.32
sp3	-67.22	6.55
sp3	-68.63	11.27
sp3	-63.48	6.95
sp3	-62.93	9.32
sp3	-68.35	11.07
sp3	-65.97	10.32
sp3	-63.5	6.92
sp3	-68.25	10.58
sp3	-67.53	6.37
sp3	-65.97	10.32
sp3	-66.22	5.3
sp3	-67.6	5.55
sp3	-67.2	10.43
sp3	-71.95	7.32
sp3	-62.93	9.32
sp3	-71.95	7.32
sp3	-69.78	9.88
sp3	-70.58	9.52
sp3	-65.9	10.33
sp3	-67.53	6.37
sp3	-67.53	6.37
sp3	-72.7	9.18
sp3	-73.93	4.53
sp3	-72.17	8.17
sp3	-68.25	10.58
sp3	-67.62	5.45
sp3	-67.53	6.37
sp3	-70.77	11.12
sp3	-67.22	6.55
sp3	-68.33	10.2
sp3	-74.54	4.13
sp3	-74.39	4.69
sp3	-73.71	4.6
sp3	-74.79	4.36
sp3	-73.9	7.35
sp3	-75.21	6.55
sp3	-74.39	4.69
sp3	-73.63	4.14
sp3	-57.99	-24.66
sp3	-73.3	4.73
sp3	-76.5	3.77
sp3	-76.54	3.79
sp3	-76.55	3.79
sp3	-76.54	3.79
sp3	-76.71	3.59
sp3	-66.55	6.93
sp3	-59.44	3.38
sp3	-59.52	2.83
sp3	-59.25	2.52
sp3	-55	-10
sp3	-68.08	8.93
sp3	-42.88	-20.75
sp3	-61.45	4.61
sp3	-59.18	-23.2
sp3	-59	-23.37
sp3	-59.2	-23.18
sp3	-59	-23.37
sp3	-59.18	-23.2
sp3	-59	-23.37
sp3	-59.18	-23.2
sp3	-74.33	4.75
[truncated: 237,115+ more rows]
